# Supplementary material for: The role of hydrodynamic interactions on the aggregation kinetics of sedimenting colloidal particles
Source: Royal Society of Chemistry journal article supplement (doi:10.1039/d1sm01637g), 2022-01-01
Supplement: d1sm01637g5.pdf [file d1sm01637g5.pdf]

# Supporting Information of the manuscript

## The role of hydrodynamic interactions on the aggregation kinetics of sedimenting colloidal particles

Turetta Lorenzo, Lattuada Marco\*

University of Fribourg, Department of Chemistry, Chemin du Musée 9, CH-1700 Fribourg

\*Corresponding author. E-mail: [marco.lattuada@unifr.ch](mailto:marco.lattuada@unifr.ch)

1) Different cluster conformations obtained for  $Pe = 0.1$  and at  $\Phi = 0.05$ .

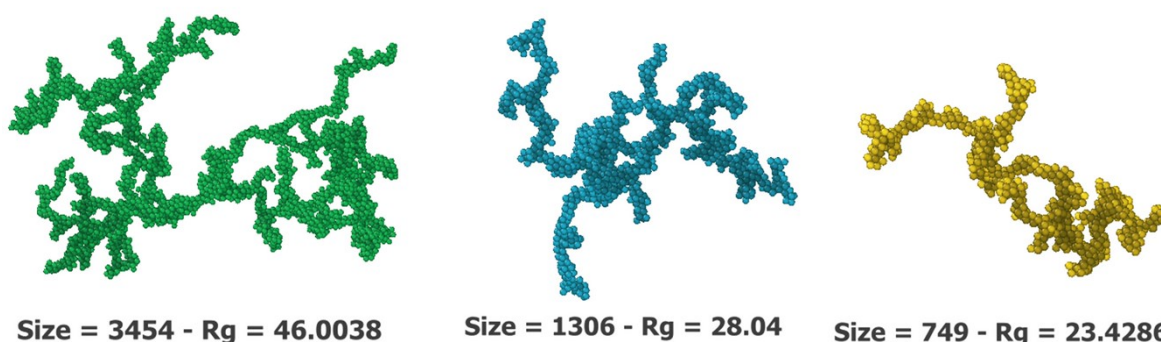

Figure S1 Different cluster conformations obtained for  $Pe = 0.1$  and  $\Phi = 0.05$  employing the RPY approximation of HI with the PSE algorithm.

2) Average cluster mass obtained at  $\Phi = 0.05$  and various  $Pe$  numbers.

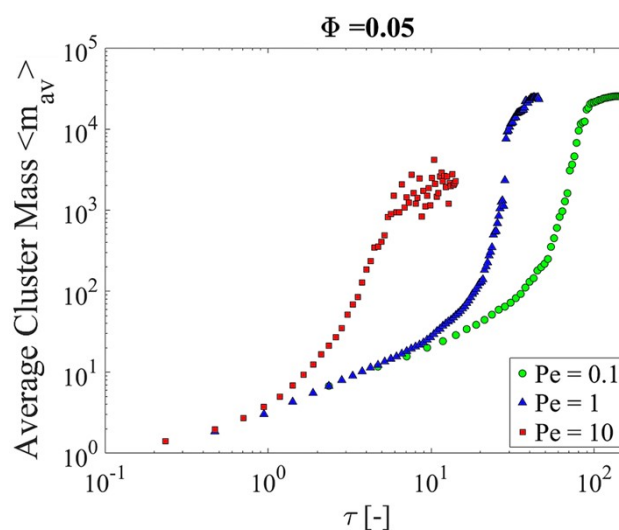

Figure S2 Dimensionless time evolution of the average mass for clusters generated under different flow conditions ( $Pe$  equal to 0.1, 1, and 10) and particle volume fraction equal to  $\Phi = 0.05$ .

- 3) Dimensionless time evolution of the average radius of gyration  $\langle R_g \rangle$  normalized by the radius of the primary particles  $R_p$  obtained from different simulations.

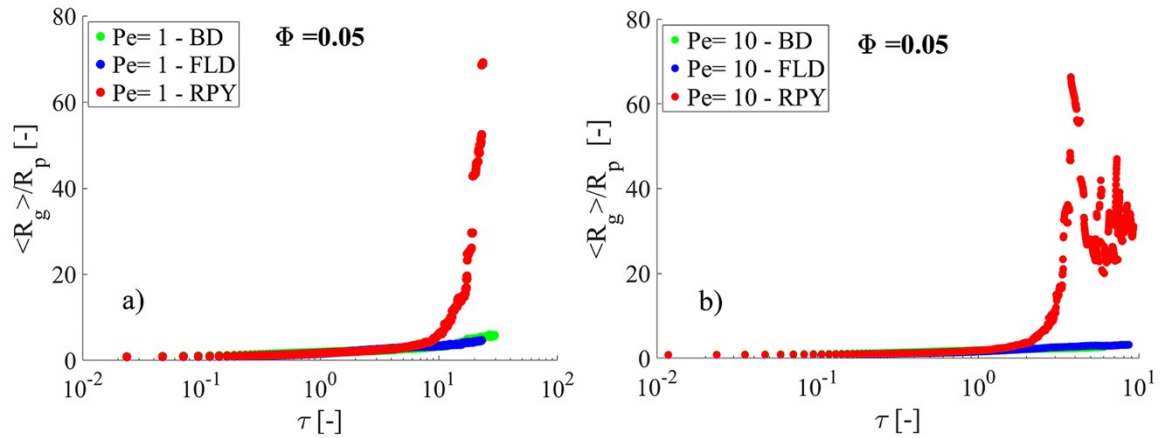

Figure S3 Dimensionless time evolution of the average radius of gyration  $\langle R_g \rangle$  normalized by the radius of the primary particles  $R_p$  obtained from simulations employing the RPY approximation of HI with the PSE algorithm (red curve), the FLD method with only lubrication forces (blue curve), and a simple BD without HI (green curve) for  $\Phi=0.05$  and  $Pe$  equal to 1 (a) and 10 (b).

- 4) Effect of tangential contact forces on the cluster morphology for simulations performed using the FLD algorithm.

a) with tangential contact forces

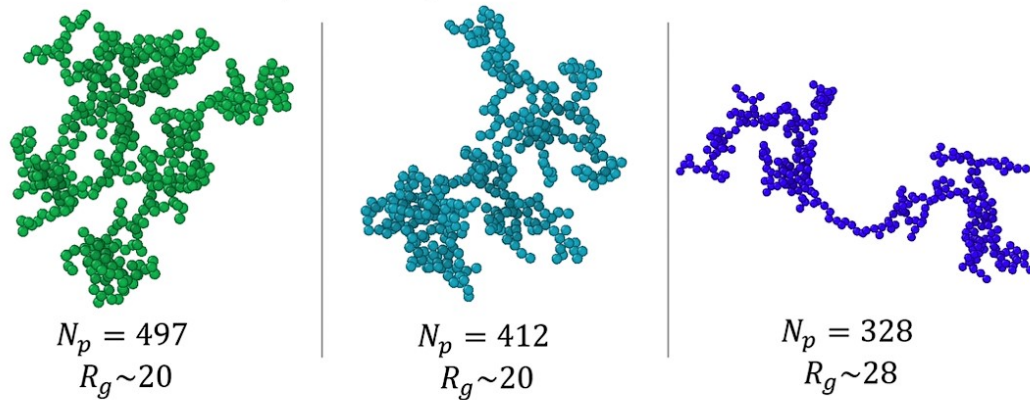

b) without tangential contact forces

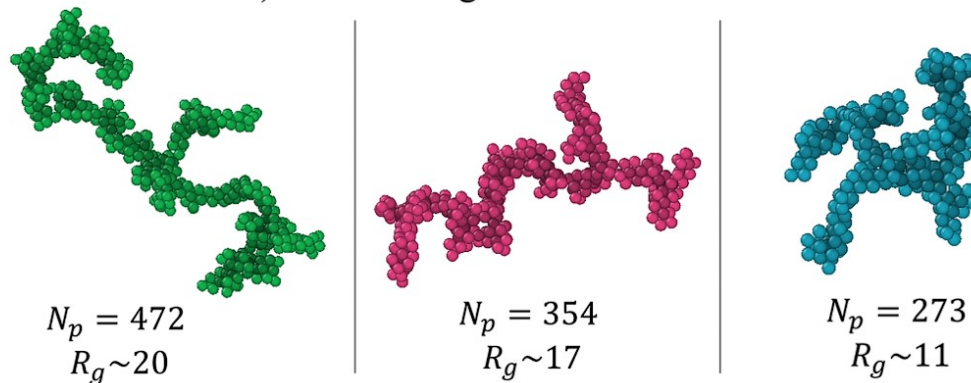

Figure S4 Effect of tangential contact forces on the cluster morphology at  $\Phi = 0.05$  and  $Pe=1$  computed using the FLD algorithm. Case a) and case b) correspond to simulations where tangential forces were included and neglected, respectively.

- 5) The evolution of fractal dimension and average particle coordination number for simulations performed with and without tangential forces

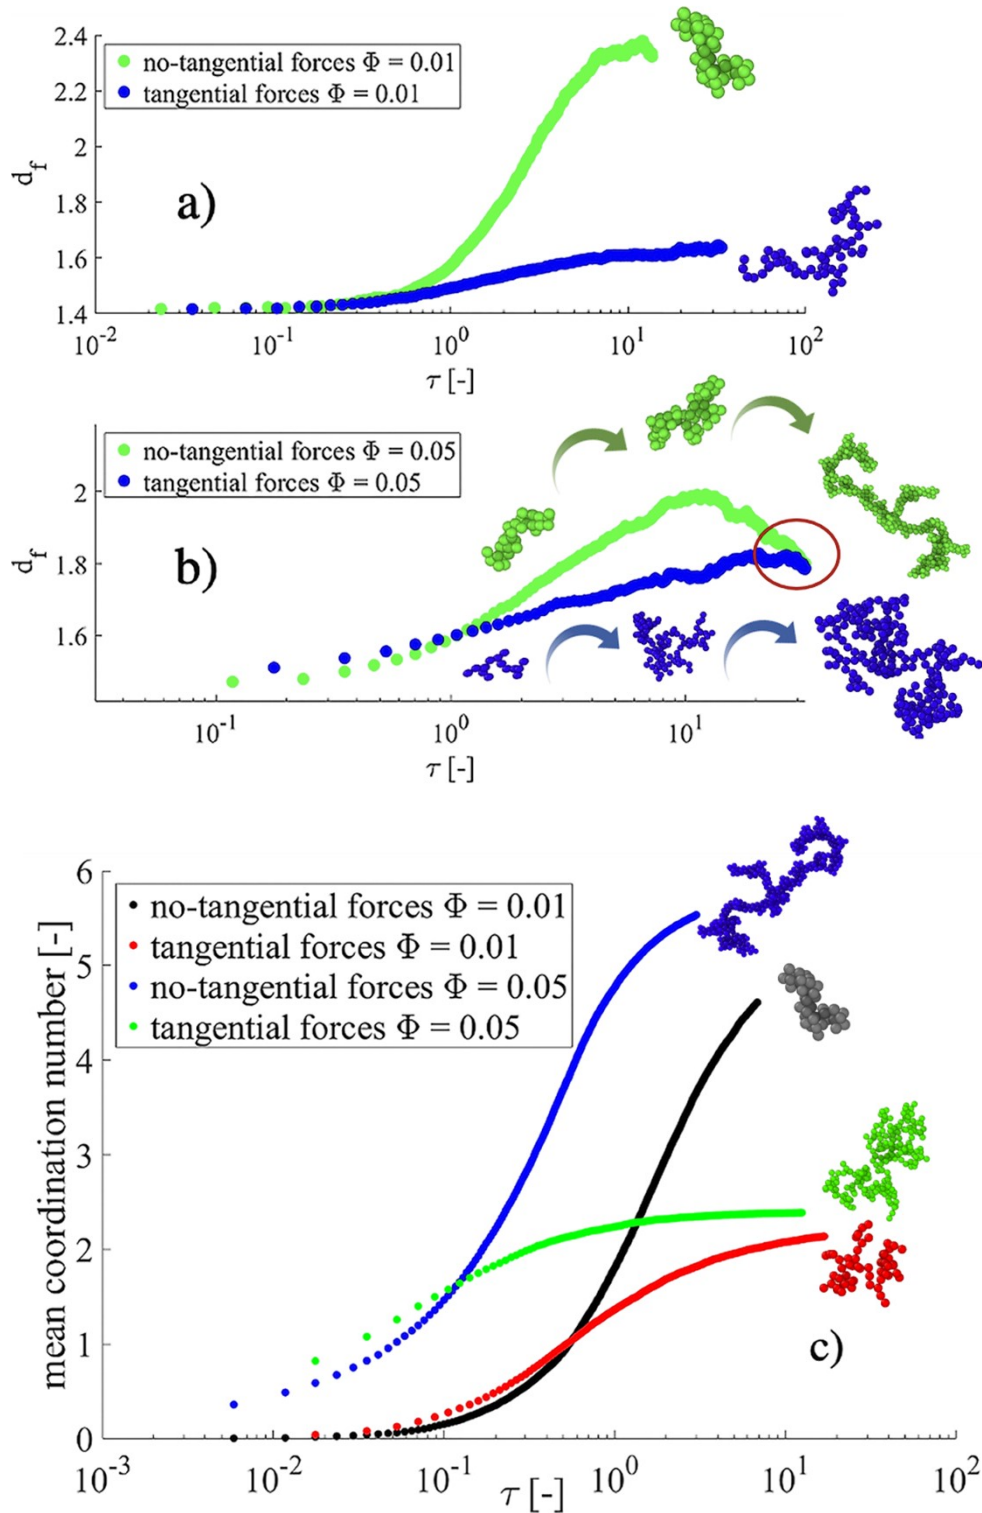

Figure S5 The evolution of fractal dimension  $d_f$  (Figure S5a and S5b) and average particle coordination number (c) for simulations performed with and without tangential forces for two different particle volume

fractions equal to 0.01 and 0.05 at  $Pe=1$ . Low values of the fractal dimension (1.6-1.9) and mean coordination number ( $\sim 2$ ) indicate very open structures which are typical of clusters formed under DLCA conditions.

- 6) Plot of the interparticle potential resulting from the attractive vdW and repulsive contact force.

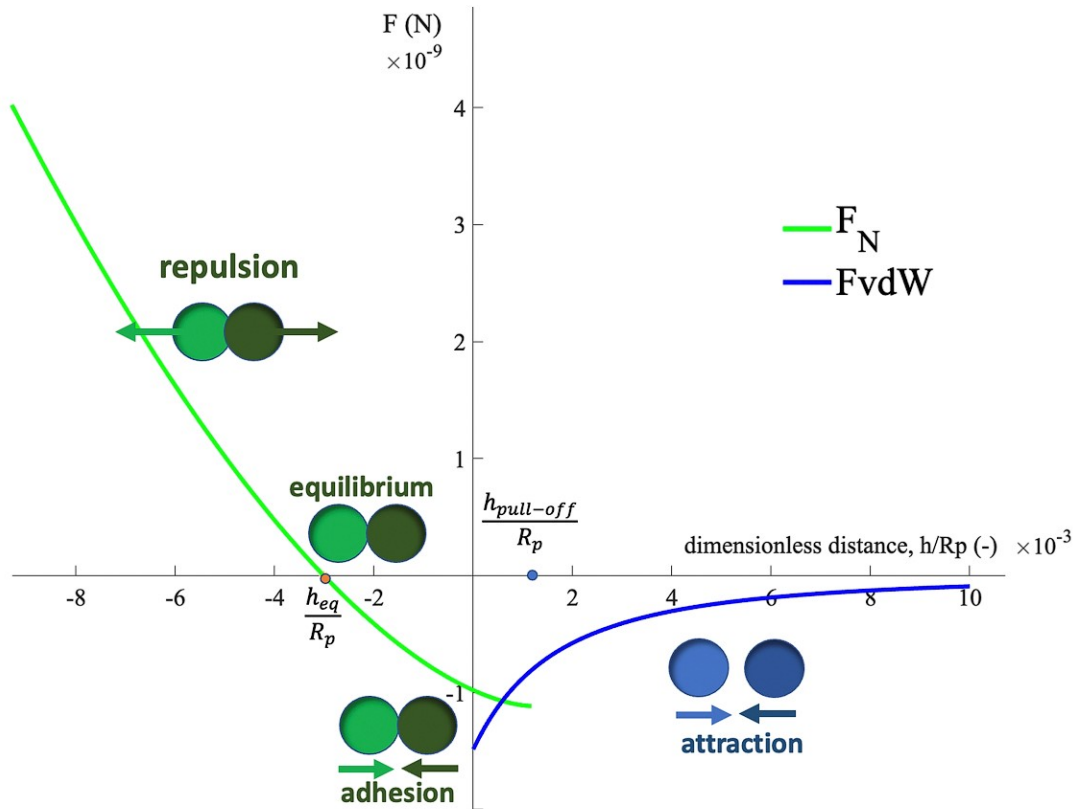

Figure S6 Plot of the interparticle potential resulting from the attractive VdW and repulsive contact force.
